# Supplementary material for: Role of metastable-adsorbed charges in the stability degradation of carbon-based electrodes for capacitive deionization
Source: Royal Society of Chemistry journal article supplement (doi:10.1039/c8ew00323h), 2018-01-01
Supplement: c8ew00323h1.pdf [file c8ew00323h1.pdf]

# Role of metastable-adsorbed charges in the stability degradation of carbon-based electrodes for capacitive deionization

Bei Li,<sup>a</sup> Tianye Zheng,<sup>a</sup> Sijia Ran,<sup>a</sup> Po-Heng Lee,<sup>b</sup> Baojun Liu,<sup>a</sup> Steven T. Boles\*<sup>a</sup>

<sup>a</sup>Department of Electrical Engineering, The Hong Kong Polytechnic University, Hung Hom, Hong Kong

<sup>b</sup>Department of Civil and Environmental Engineering, The Hong Kong Polytechnic University, Hung Hom, Hong Kong

\* Corresponding author. Phone: +852 2766 6174;

e-mail: [steven.t.boles@polyu.edu.hk](mailto:steven.t.boles@polyu.edu.hk)

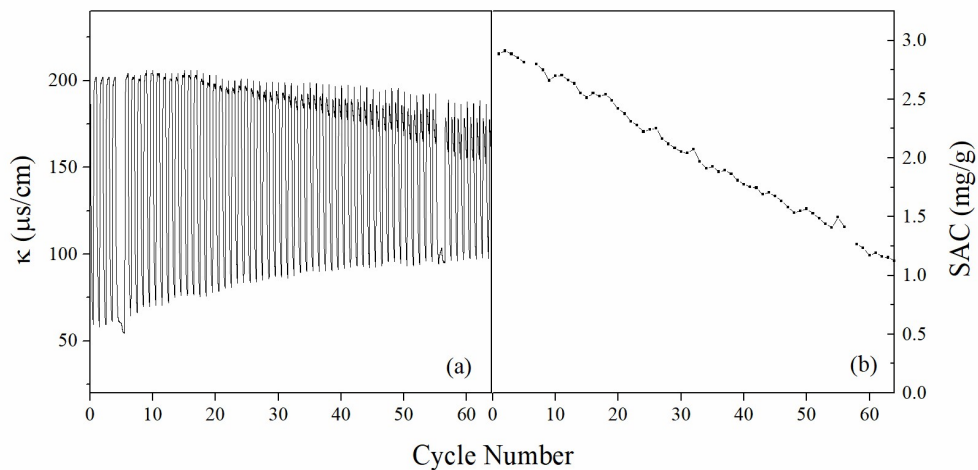

Figure S1 Variation of conductivity and salt adsorption capacity (SAC) over 64 cycles

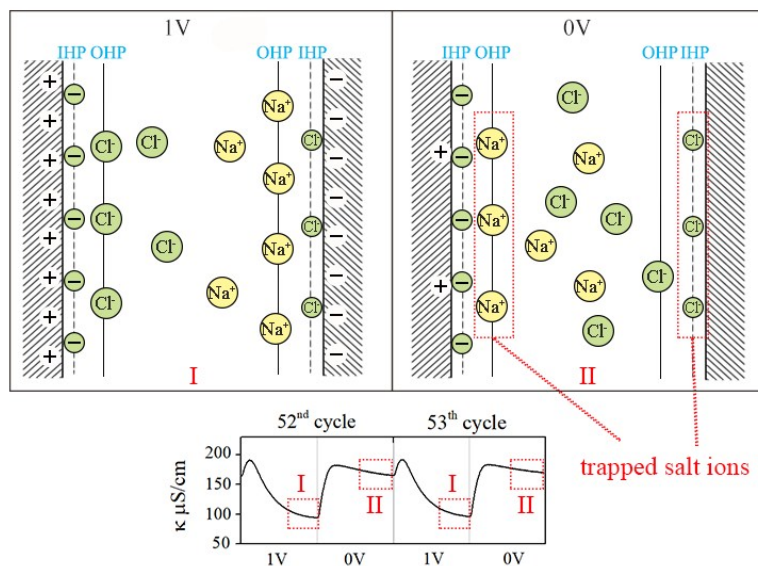

Figure S2 The schematic illustration of ion/charge distribution at the surface of degraded electrodes based on classic double-layer model under two working conditions (1V-charging, 0V-discharging)
